# Supplementary material for: Solvation of Large Polycyclic Aromatic Hydrocarbons in Helium: Cationic and Anionic Hexabenzocoronene
Source: MDPI journal article supplement (doi:10.3390/molecules27196764), 2022-10-10
Supplement: s1 [file s1]

## Supplementary Material

### Adsorption of Helium on large, planar polycyclic aromatic hydrocarbons: Cationic and anionic hexabenzocoronene

Miriam Kappe<sup>1</sup>, Florent Calvo<sup>2\*</sup>, Johannes Schöntag<sup>3</sup>, Holger Bettinger<sup>3</sup>, Serge Krasnokutski<sup>4</sup>,  
Martin Kuhn<sup>1</sup>, Elisabeth Gruber<sup>1</sup>, Fabio Zappa<sup>1</sup>, Paul Scheier<sup>1</sup>, Olof Echt<sup>1,5\*</sup>

<sup>1</sup> Institut für Ionenphysik und Angewandte Physik, Universität Innsbruck, 6020 Innsbruck, Austria

<sup>2</sup> Université Grenoble Alpes, CNRS, LiPhy, 38000 Grenoble, France

<sup>3</sup> Institut für Organische Chemie, Universität Tübingen, 72076 Tübingen, Germany

<sup>4</sup> Laboratory Astrophysics and Cluster Physics Group of the MPI for Astronomy at the University of Jena, Helmholtzweg 3, D-07743 Jena, Germany

<sup>5</sup> Department of Physics, University of New Hampshire, Durham NH 03824, USA

\* Corresponding authors:

florent.calvo@univ-grenoble-alpes.fr (Florent Calvo), olof.echt@unh.edu (Olof Echt)

#### Data provided in this file (HBC\_SI\_220901f.docx):

- Fig. S1. Mass spectra of positively and negatively charged Hbc<sup>±</sup> ions complexed with helium.
- Fig. S2. First derivatives of logarithmic ion abundances for cation and anions, and second derivatives of computed energies.
- Fig. S3. Computed front and side views of He<sub>n</sub>Hbc<sup>+</sup> for  $n \leq 90$ . For each size, the helium densities obtained from the PIMD simulations are superimposed on the structure of Hbc<sup>+</sup>.
- Table S1. Computed classical and quantum energies *versus* size  $n$  for He<sub>n</sub>Hbc<sup>±</sup>.
- Table S2. Cartesian coordinates ( $x, y, z$ ) and partial charges ( $q$ ) on each atom of bare Hbc<sup>+</sup> computed using DFT at the M06-2X/6-31+G\* level.
- Table S3. Cartesian coordinates ( $x, y, z$ ) and partial charges ( $q$ ) on each atom of bare Hbc<sup>-</sup> computed using DFT at the M06-2X/6-31+G\* level.

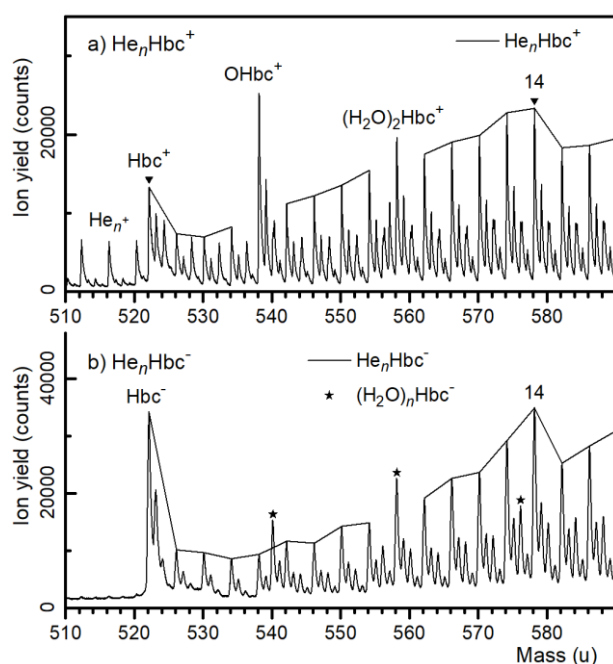

**Figure. S1.** Mass spectra of positively and negatively charged Hbc<sup>±</sup> ions complexed with helium (panels a and b, respectively). Mass peaks due to isotopically pure He<sub>n</sub>Hbc<sup>±</sup> (i.e. <sup>4</sup>He<sub>n</sub><sup>12</sup>C<sub>42</sub><sup>1</sup>H<sub>18</sub>, mass 522.141 u for  $n = 0$ ) are connected by solid lines. Contributions due to <sup>16</sup>O and <sup>1</sup>H<sub>2</sub><sup>16</sup>O contaminants are labeled. In agreement with mass spectra obtained by laser-induced desorption [1], there is no evidence for the “fairly facile loss of up to four hydrogen atoms” from Hbc cations reported by Reed and Tennent upon electron ionization of bare Hbc [2].

1. Mavrinskaya, N.; Räder, H. J.; Müllen, K. Nonlinear behavior during semi-quantitative analysis of thin organic layers by laser desorption mass spectrometry. *Rapid Commun. Mass Spectrom.* **2011**, *25*, 2196-2200, doi:10.1002/rcm.5102.
2. Reed, R. I.; Tennent, A. Mass spectrum of 1-12, 2-3, 4-5, 6-7, 8-9, 10-11-hexabenzocoronene. *Org. Mass Spectrom.* **1971**, *5*, 619-621, doi:10.1002/oms.1210050513.

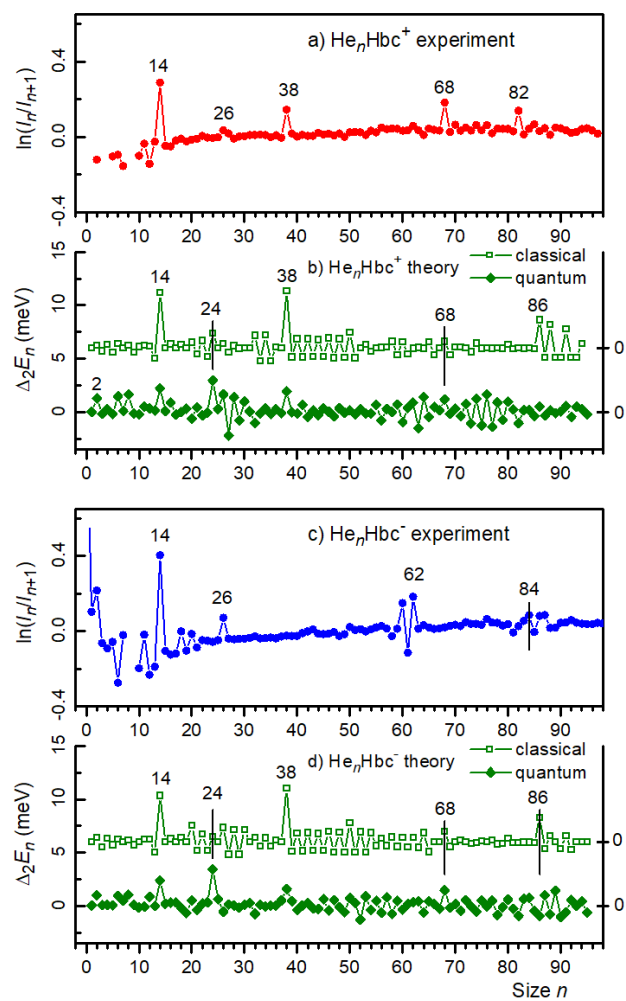

**Figure. S2.** Panels a and c: First derivatives of logarithmic ion abundances for cation and anions, respectively. The corresponding second derivatives of computed energies are displayed in panels b and d, respectively.

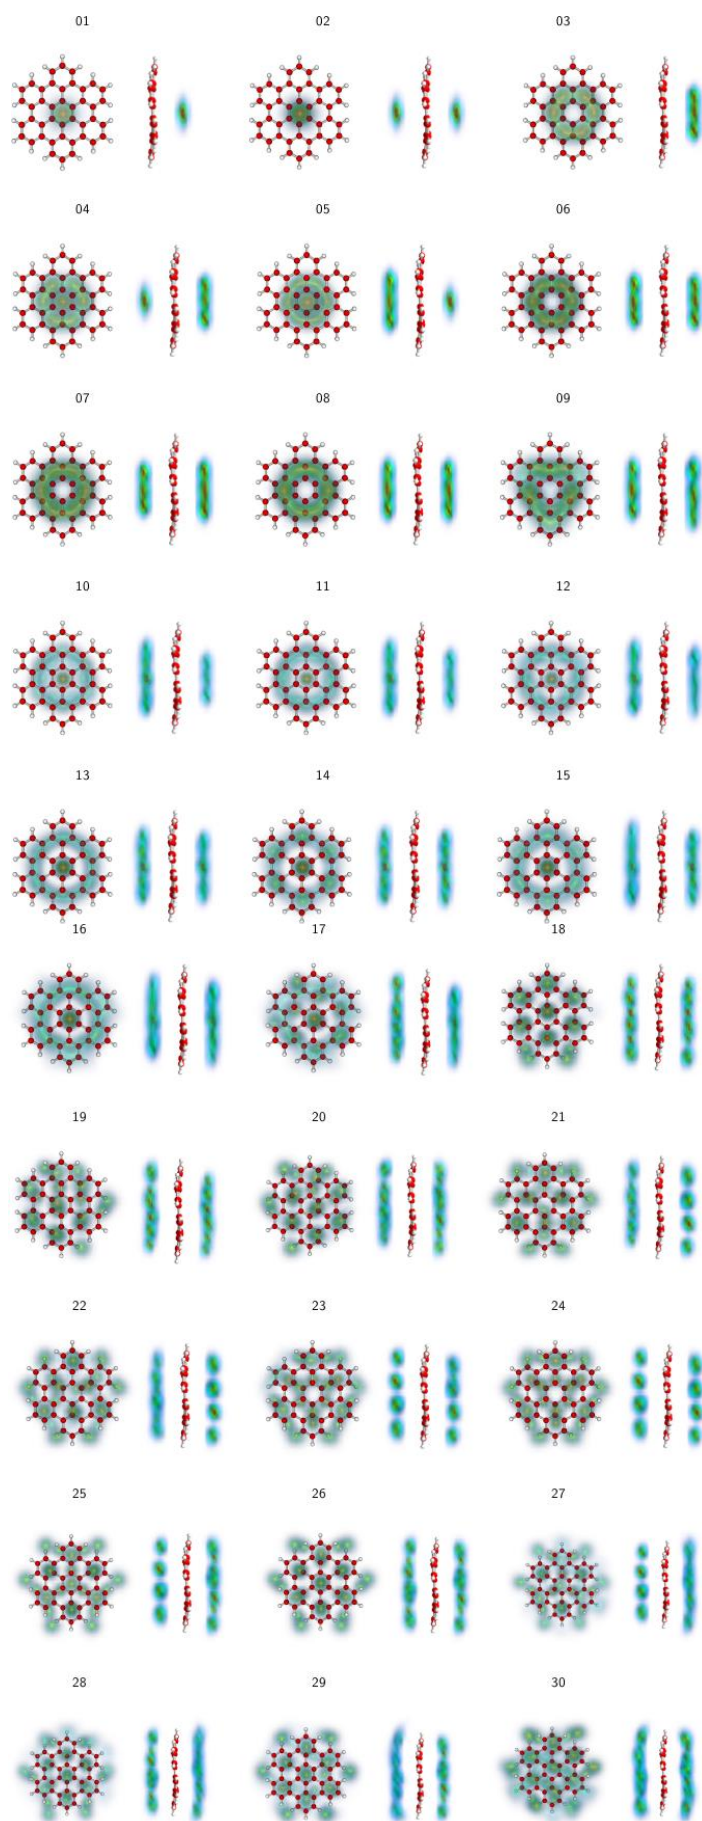

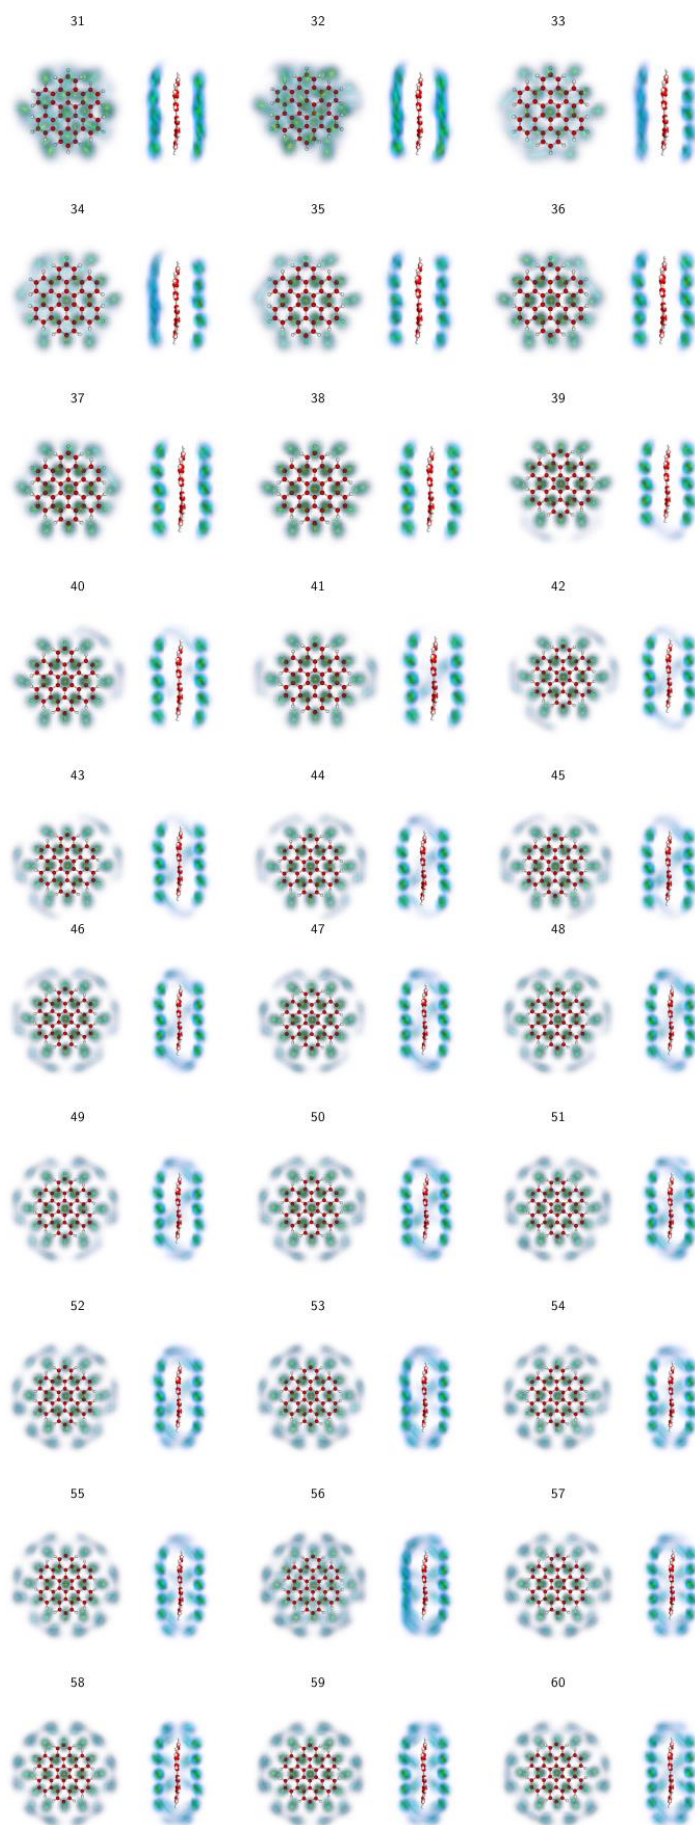



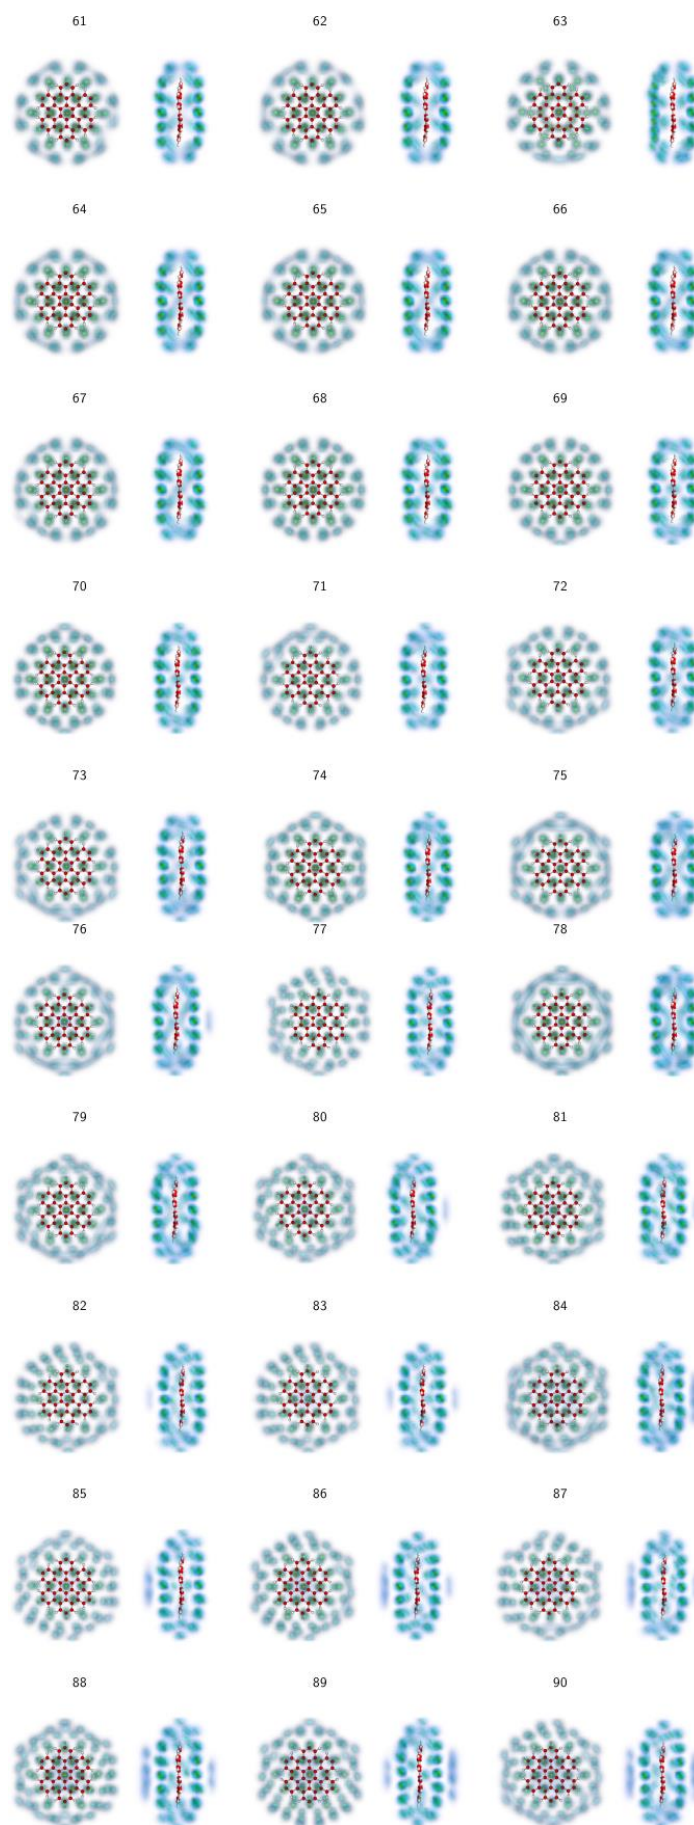

**Figure. S3.** Computed front and side views of  $\text{He}_n\text{Hbc}^+$  for  $n < 90$ . For each size, the helium densities obtained from the PIMD simulations are superimposed on the structure of  $\text{Hbc}^+$ .

**Table S1.** Computed energies *versus* size  $n$  for  $\text{He}_n\text{Hbc}^+$  and  $\text{He}_n\text{Hbc}^-$ . Classical energies  $E_c$  are listed in meV per atom; total quantum energies  $E_q$  are listed in Hartree. The number of He atoms on either side of  $\text{Hbc}^\pm$  is indicated for some sizes  $n$  as  $p+q$ , with  $p+q = n$ .

**$\text{He}_n\text{Hbc}^+$**

| $n$ | $E_c/n$ (meV) | arrangement | $E_q$ (Hartree)         | arrangement |
|-----|---------------|-------------|-------------------------|-------------|
| 0   | 0             | 0+0         | 0                       |             |
| 01  | 24.18947      | 1+0         | -6.819429100869068E-004 |             |
| 02  | 24.19581      | 1+1         | -1.363778672277615E-003 |             |
| 03  | 24.11157      | 3+0         | -1.998802168255109E-003 |             |
| 04  | 24.13835      | 3+1         | -2.640218261895236E-003 |             |
| 05  | 24.08661      | 4+1         | -3.272270324304337E-003 |             |
| 06  | 24.12241      | 3+3         | -3.912133948980715E-003 |             |
| 07  | 24.09351      | 4+3         | -4.497461412557004E-003 |             |
| 08  | 24.07104      | 4+4         | -5.079374470285785E-003 |             |
| 09  | 24.02515      | 5+4         | -5.600732300559383E-003 |             |
| 10  | 24.02920      | 7+3         | -6.127710283877961E-003 | 6+4         |
| 11  | 24.02170      | 7+4         | -6.661496498089828E-003 |             |
| 12  | 23.99329      | 7+5         | -7.176870273546458E-003 |             |
| 13  | 23.95650      | 7+6         | -7.680213892810647E-003 |             |
| 14  | 23.99517      | 7+7         | -8.178316826467170E-003 |             |
| 15  | 23.68208      | 8+7         | -8.594846555222033E-003 |             |
| 16  | 23.40806      | 8+8         | -9.007970570167983E-003 |             |
| 17  | 23.14412      | 9+8         | -9.388366269025264E-003 |             |
| 18  | 22.90958      | 9+9         | -9.777444754939824E-003 |             |
| 19  | 22.68241      | 10+9        | -1.016709739443137E-002 |             |
| 20  | 22.47793      | 10+10       | -1.054526561792713E-002 |             |
| 21  | 22.26732      | 12+9        | -1.094660765538418E-002 |             |
| 22  | 22.10127      | 12+10       | -1.133218722458680E-002 |             |
| 23  | 21.91985      | 12+11       | -1.172992129189334E-002 |             |
| 24  | 21.78641      | 12+12       | -1.212923421536824E-002 |             |
| 25  | 21.60853      | 13+12       | -1.242021590341250E-002 |             |
| 26  | 21.44460      | 13+13       | -1.270098125667590E-002 |             |
| 27  | 21.27876      | 15+12       | -1.292155947695439E-002 |             |
| 28  | 21.13848      | 15+13       | -1.322285608835159E-002 |             |
| 29  | 21.00088      | 16+13       | -1.347309807775598E-002 |             |
| 30  | 20.87340      | 15+15       | -1.375225445625423E-002 |             |
| 31  | 20.75339      | 16+15       | -1.399631084894553E-002 |             |
| 32  | 20.64117      | 16+16       | -1.423801823902286E-002 |             |
| 33  | 20.49945      | 17+16       | -1.451829660747848E-002 |             |
| 34  | 20.40148      | 18+16       | -1.480433530552930E-002 |             |
| 35  | 20.27480      | 18+17       | -1.507808802768300E-002 |             |
| 36  | 20.18857      | 18+18       | -1.535869692998750E-002 |             |
| 37  | 20.10423      | 19+18       | -1.562981070083166E-002 |             |
| 38  | 20.02457      | 19+19       | -1.590588835335648E-002 |             |
| 39  | 19.81153      |             | -1.611094388771822E-002 |             |
| 40  | 19.63046      |             | -1.631686923352261E-002 |             |
| 41  | 19.43745      |             | -1.652772420447603E-002 |             |
| 42  | 19.27381      |             | -1.671359438330699E-002 |             |
| 43  | 19.09801      |             | -1.691731672340760E-002 |             |
| 44  | 18.94805      |             | -1.711576472219008E-002 |             |
| 45  | 18.78734      |             | -1.732388974104613E-002 |             |
| 46  | 18.65057      |             | -1.751956933468870E-002 |             |
| 47  | 18.49989      |             | -1.771429968054831E-002 |             |
| 48  | 18.37484      |             | -1.792383864483180E-002 |             |
| 49  | 18.23722      |             | -1.812082086013770E-002 |             |
| 50  | 18.12235      |             | -1.832024239610316E-002 |             |
| 51  | 17.98294      |             | -1.851379333162801E-002 |             |
| 52  | 17.86687      |             | -1.871593138730249E-002 |             |
| 53  | 17.75542      |             | -1.890889066831103E-002 |             |
| 54  | 17.64200      |             | -1.910562087637529E-002 |             |
| 55  | 17.53831      |             | -1.930730725308037E-002 |             |
| 56  | 17.43836      |             | -1.948405924848980E-002 |             |

|     |          |                         |
|-----|----------|-------------------------|
| 57  | 17.34131 | -1.968955056717587E-002 |
| 58  | 17.24617 | -1.988490516138827E-002 |
| 59  | 17.14384 | -2.007946441713342E-002 |
| 60  | 17.05585 | -2.024880132826827E-002 |
| 61  | 16.96111 | -2.045282868075907E-002 |
| 62  | 16.87862 | -2.064245285043046E-002 |
| 63  | 16.79955 | -2.079971461014480E-002 |
| 64  | 16.72230 | -2.101268969669519E-002 |
| 65  | 16.64776 | -2.117387344673725E-002 |
| 66  | 16.56668 | -2.135224838897270E-002 |
| 67  | 16.49722 | -2.151313499707107E-002 |
| 68  | 16.42956 | -2.166816802953964E-002 |
| 69  | 16.35509 | -2.178038991420668E-002 |
| 70  | 16.29173 | -2.189915446309851E-002 |
| 71  | 16.22874 | -2.200654339744468E-002 |
| 72  | 16.16664 | -2.212775329575125E-002 |
| 73  | 16.10601 | -2.222127109581134E-002 |
| 74  | 16.05193 | -2.235404844442194E-002 |
| 75  | 15.99341 | -2.244169419449153E-002 |
| 76  | 15.93685 | -2.257457450532116E-002 |
| 77  | 15.88189 | -2.264680789840260E-002 |
| 78  | 15.82891 | -2.277010219368248E-002 |
| 79  | 15.77722 | -2.286056622424507E-002 |
| 80  | 15.72713 | -2.297763900433406E-002 |
| 81  | 15.67398 | -2.305957748686307E-002 |
| 82  | 15.62308 | -2.313263927907334E-002 |
| 83  | 15.57345 | -2.324467600953441E-002 |
| 84  | 15.52542 | -2.335066321096539E-002 |
| 85  | 15.47864 | -2.345006016868611E-002 |
| 86  | 15.43367 | -2.356367943430589E-002 |
| 87  | 15.35938 | -2.365896120213054E-002 |
| 88  | 15.29695 | -2.376677654177332E-002 |
| 89  | 15.21125 | -2.386909272527251E-002 |
| 90  | 15.13719 | -2.397523672418906E-002 |
| 91  | 15.07454 | -2.408023571016252E-002 |
| 92  | 14.99417 | -2.416516938158190E-002 |
| 93  | 14.92478 | -2.426665934072722E-002 |
| 94  | 14.86647 | -2.435018307739516E-002 |
| 95  | 14.80525 | -2.442364401995693E-002 |
| 96  | 14.74498 | -2.450390740524350E-002 |
| 97  | 14.67958 | -2.457857187888973E-002 |
| 98  | 14.62306 | -2.465169939497332E-002 |
| 99  | 14.56668 | -2.472794201027822E-002 |
| 100 | 14.51121 | -2.480685352856155E-002 |
| 101 | 14.45074 | -2.487051631556957E-002 |
| 102 | 14.39842 | -2.494968743716937E-002 |
| 103 | 14.34584 | -2.502612924413018E-002 |
| 104 | 14.29408 | -2.509003184761485E-002 |
| 105 | 14.24401 | -2.518643102847318E-002 |
| 106 | 14.19422 | -2.524355803577767E-002 |
| 107 | 14.14439 | -2.530135509026720E-002 |
| 108 | 14.08999 | -2.538342302369289E-002 |
| 109 | 14.03484 | -2.544163331445132E-002 |
| 110 | 13.97784 | -2.549908934545182E-002 |

# He<sub>n</sub>Hbc<sup>-</sup>

| $n$ | $E_c/n$ (meV) | arrangement | $E_q$ (Hartree)         | arrangement |
|-----|---------------|-------------|-------------------------|-------------|
| 01  | 25.12082      | 1+0         | -7.116418775573115E-004 |             |
| 02  | 25.12654      | 1+1         | -1.420823471528046E-003 |             |
| 03  | 24.98347      | 3+0         | -2.092734140784047E-003 |             |
| 04  | 25.02482      | 3+1         | -2.761061024997960E-003 |             |
| 05  | 24.97763      | 4+1         | -3.425169514403443E-003 |             |
| 06  | 24.99146      | 3+3         | -4.086675045542022E-003 |             |

|    |          |       |                         |     |
|----|----------|-------|-------------------------|-----|
| 07 | 24.96376 | 4+3   | -4.713170824590654E-003 | 6+4 |
| 08 | 24.93732 | 4+4   | -5.320962083349337E-003 |     |
| 09 | 24.89609 | 5+4   | -5.889301144537721E-003 |     |
| 10 | 24.88995 | 7+3   | -6.452584862180117E-003 |     |
| 11 | 24.88397 | 7+4   | -7.021205408035449E-003 |     |
| 12 | 24.85830 | 7+5   | -7.592436840325503E-003 |     |
| 13 | 24.81747 | 7+6   | -8.131017591997584E-003 |     |
| 14 | 24.85175 | 7+7   | -8.668839725736503E-003 |     |
| 15 | 24.59070 | 8+7   | -9.118123245984990E-003 |     |
| 16 | 24.36182 | 8+8   | -9.559279636643185E-003 |     |
| 17 | 24.14161 | 9+8   | -9.988352733290639E-003 |     |
| 18 | 23.94585 | 9+9   | -1.040492682996538E-002 |     |
| 19 | 23.74842 | 10+9  | -1.082741184497784E-002 |     |
| 20 | 23.56941 | 10+10 | -1.127319321144245E-002 |     |
| 21 | 23.33293 | 11+10 | -1.169906479332637E-002 |     |
| 22 | 23.15235 | 12+10 | -1.213826256198835E-002 |     |
| 23 | 22.95443 | 12+11 | -1.256896080431156E-002 |     |
| 24 | 22.80534 | 12+12 | -1.298700397331822E-002 |     |
| 25 | 22.64714 | 13+12 | -1.327810897679332E-002 |     |
| 26 | 22.50022 | 13+13 | -1.354490643642256E-002 |     |
| 27 | 22.31444 | 14+13 | -1.383051108387034E-002 |     |
| 28 | 22.18341 | 15+13 | -1.411122453405846E-002 |     |
| 29 | 22.02168 | 15+14 | -1.438980830387840E-002 |     |
| 30 | 21.90924 | 15+15 | -1.467417803147202E-002 |     |
| 31 | 21.76729 | 16+15 | -1.495397979838546E-002 |     |
| 32 | 21.63409 | 16+16 | -1.522273530177608E-002 |     |
| 33 | 21.49686 | 17+16 | -1.551794644929291E-002 |     |
| 34 | 21.37936 | 18+16 | -1.580781118422390E-002 |     |
| 35 | 21.25754 | 18+17 | -1.609886636420984E-002 |     |
| 36 | 21.15299 | 18+18 | -1.638847259402568E-002 |     |
| 37 | 21.04948 | 19+18 | -1.667607376498591E-002 |     |
| 38 | 20.95144 | 19+19 | -1.694406147064903E-002 |     |
| 39 | 20.72935 |       | -1.715319494178007E-002 |     |
| 40 | 20.53933 |       | -1.734537116521886E-002 |     |
| 41 | 20.33814 |       | -1.755044758327909E-002 |     |
| 42 | 20.16636 |       | -1.775295228073760E-002 |     |
| 43 | 19.98256 |       | -1.794600510916209E-002 |     |
| 44 | 19.82473 |       | -1.814792466474686E-002 |     |
| 45 | 19.65671 |       | -1.835874947886416E-002 |     |
| 46 | 19.51272 |       | -1.854541878674226E-002 |     |
| 47 | 19.35376 |       | -1.874630482521099E-002 |     |
| 48 | 19.22066 |       | -1.892722217491672E-002 |     |
| 49 | 19.07419 |       | -1.911219281743871E-002 |     |
| 50 | 18.95207 |       | -1.931828430456439E-002 |     |
| 51 | 18.79986 |       | -1.949634468729518E-002 |     |
| 52 | 18.67216 |       | -1.966306491643768E-002 |     |
| 53 | 18.53104 |       | -1.987703376837287E-002 |     |
| 54 | 18.41312 |       | -2.005804010385840E-002 |     |
| 55 | 18.28359 |       | -2.025146153291822E-002 |     |
| 56 | 18.16457 |       | -2.042669088315748E-002 |     |
| 57 | 18.04398 |       | -2.062479540916731E-002 |     |
| 58 | 17.93354 |       | -2.079176633512634E-002 |     |
| 59 | 17.81902 |       | -2.098584109732824E-002 |     |
| 60 | 17.71521 |       | -2.116183822928947E-002 |     |
| 61 | 17.60747 |       | -2.135047719887743E-002 |     |
| 62 | 17.51089 |       | -2.153182508783954E-002 |     |
| 63 | 17.41082 |       | -2.169936172734758E-002 |     |
| 64 | 17.32160 |       | -2.185006755155365E-002 |     |
| 65 | 17.22170 |       | -2.202332305462285E-002 |     |
| 66 | 17.13864 |       | -2.218031880982738E-002 |     |
| 67 | 17.05742 |       | -2.232999447470733E-002 |     |
| 68 | 16.97846 |       | -2.248882701097013E-002 |     |
| 69 | 16.88755 |       | -2.259290531412278E-002 |     |
| 70 | 16.80522 |       | -2.270265776503931E-002 |     |



|     |          |                         |
|-----|----------|-------------------------|
| 71  | 16.72525 | -2.280469542406496E-002 |
| 72  | 16.64498 | -2.292281115087197E-002 |
| 73  | 16.56688 | -2.302085936401227E-002 |
| 74  | 16.49288 | -2.311976161846199E-002 |
| 75  | 16.42139 | -2.323814455001898E-002 |
| 76  | 16.35085 | -2.333656636072109E-002 |
| 77  | 16.28152 | -2.343536715801672E-002 |
| 78  | 16.21166 | -2.351531973205301E-002 |
| 79  | 16.14600 | -2.362605659889274E-002 |
| 80  | 16.08357 | -2.374048145625374E-002 |
| 81  | 16.01878 | -2.383222563799544E-002 |
| 82  | 15.95623 | -2.393314702866691E-002 |
| 83  | 15.89571 | -2.40676571981253E-002  |
| 84  | 15.83680 | -2.417737004145992E-002 |
| 85  | 15.77958 | -2.425897567391444E-002 |
| 86  | 15.72440 | -2.435703919853898E-002 |
| 87  | 15.64417 | -2.448896294933279E-002 |
| 88  | 15.57270 | -2.458333781336249E-002 |
| 89  | 15.49617 | -2.470573599658040E-002 |
| 90  | 15.42119 | -2.477529602900300E-002 |
| 91  | 15.35449 | -2.488238792425066E-002 |
| 92  | 15.28288 | -2.501107982285475E-002 |
| 93  | 15.22044 | -2.511849080237368E-002 |
| 94  | 15.15946 | -2.522541290913338E-002 |
| 95  | 15.09961 | -2.531567466715599E-002 |
| 96  | 15.04113 | -2.542852798802455E-002 |
| 97  | 14.98388 | -2.549786324635844E-002 |
| 98  | 14.92779 | -2.557659400933895E-002 |
| 99  | 14.86428 | -2.566771129622613E-002 |
| 100 | 14.80973 | -2.575392003558161E-002 |
| 101 | 14.74867 | -2.584019750702430E-002 |
| 102 | 14.69633 | -2.588519289899248E-002 |
| 103 | 14.63891 | -2.595482131508488E-002 |
| 104 | 14.58803 | -2.604027193291135E-002 |
| 105 | 14.53292 | -2.612242078174365E-002 |
| 106 | 14.47821 | -2.619641851302456E-002 |
| 107 | 14.42389 | -2.625011528166922E-002 |
| 108 | 14.36767 | -2.633887879637835E-002 |
| 109 | 14.31131 | -2.637339141697072E-002 |
| 110 | 14.25455 | -2.644290495505031E-002 |

**Table S2.** Cartesian coordinates (x,y,z) and partial charges (*q*) on each atom of bare Hbc<sup>+</sup> computed using DFT at the M06-2X/6-31+G\* level

| Atom | x         | y         | z         | <i>q</i>  |
|------|-----------|-----------|-----------|-----------|
| C    | 1.427694  | 0.000000  | 0.002383  | -0.067403 |
| C    | 0.721205  | -1.227473 | 0.003547  | 0.048757  |
| C    | -0.721205 | -1.227473 | -0.003547 | 0.042697  |
| C    | -1.427694 | 0.000000  | -0.002383 | -0.082617 |
| C    | -0.721205 | 1.227473  | -0.003547 | 0.042697  |
| C    | 0.721205  | 1.227473  | 0.003547  | 0.048757  |
| C    | 2.870123  | 0.000000  | 0.028184  | 0.016042  |
| C    | 1.435537  | -2.469514 | -0.015514 | 0.003980  |
| C    | -1.435537 | -2.469514 | 0.015514  | 0.030115  |
| C    | -2.870123 | 0.000000  | -0.028184 | 0.068476  |
| C    | -1.435537 | 2.469514  | 0.015514  | 0.030115  |
| C    | 1.435537  | 2.469514  | -0.015514 | 0.003980  |
| C    | 4.984395  | -1.197447 | 0.146065  | -0.143655 |
| C    | 2.860433  | -2.476789 | -0.035041 | 0.055677  |
| C    | 0.730751  | -3.705819 | -0.040789 | 0.067793  |
| C    | -0.730751 | -3.705819 | 0.040789  | 0.006919  |
| C    | -2.860433 | -2.476789 | 0.035041  | 0.085660  |
| C    | -4.984395 | -1.197447 | -0.146065 | -0.113540 |
| C    | -4.984395 | 1.197447  | -0.146065 | -0.113540 |
| C    | -2.860433 | 2.476789  | 0.035041  | 0.085660  |
| C    | -0.730751 | 3.705819  | 0.040789  | 0.006919  |
| C    | 0.730751  | 3.705819  | -0.040789 | 0.067793  |
| C    | 2.860433  | 2.476789  | -0.035041 | 0.055677  |
| C    | 4.984395  | 1.197447  | 0.146065  | -0.143655 |
| C    | 3.583942  | -1.222002 | 0.044938  | 0.052757  |
| C    | 1.445769  | -4.890617 | -0.157635 | -0.181232 |
| C    | -1.445769 | -4.890617 | 0.157635  | -0.160580 |
| C    | -3.583942 | -1.222002 | -0.044938 | -0.005018 |
| C    | -3.583942 | 1.222002  | -0.044938 | -0.005018 |
| C    | -1.445769 | 4.890617  | 0.157635  | -0.160580 |
| C    | 1.445769  | 4.890617  | -0.157635 | -0.181232 |
| C    | 3.583942  | 1.222002  | 0.044938  | 0.052757  |
| C    | 3.536758  | -3.702472 | -0.144961 | -0.189055 |
| C    | 2.839193  | -4.888746 | -0.215789 | -0.056921 |
| C    | -2.839193 | -4.888746 | 0.215789  | -0.059379 |
| C    | -3.536758 | -3.702472 | 0.144961  | -0.200515 |
| C    | -5.676612 | 0.000000  | -0.206223 | -0.123959 |
| C    | -3.536758 | 3.702472  | 0.144961  | -0.200515 |
| C    | -2.839193 | 4.888746  | 0.215789  | -0.059379 |
| C    | 2.839193  | 4.888746  | -0.215789 | -0.056921 |
| C    | 3.536758  | 3.702472  | -0.144961 | -0.189055 |
| C    | 5.676612  | 0.000000  | 0.206223  | -0.100632 |
| H    | -5.547269 | 2.119522  | -0.201337 | 0.150474  |
| H    | 5.547269  | -2.119522 | 0.201337  | 0.151183  |
| H    | 4.616101  | -3.734044 | -0.200691 | 0.153170  |
| H    | -4.616101 | -3.734044 | 0.200691  | 0.153368  |
| H    | -4.616101 | 3.734044  | 0.200691  | 0.153368  |
| H    | 4.616101  | 3.734044  | -0.200691 | 0.153170  |
| H    | 0.933133  | -5.840847 | -0.226938 | 0.157573  |
| H    | -0.933133 | -5.840847 | 0.226938  | 0.149897  |
| H    | -5.547269 | -2.119522 | -0.201337 | 0.150474  |
| H    | -0.933133 | 5.840847  | 0.226938  | 0.149897  |
| H    | 0.933133  | 5.840847  | -0.226938 | 0.157573  |
| H    | 5.547269  | 2.119522  | 0.201337  | 0.151183  |
| H    | 3.373547  | -5.826632 | -0.319393 | 0.146595  |
| H    | -3.373547 | -5.826632 | 0.319393  | 0.148317  |
| H    | -6.756334 | 0.000000  | -0.301180 | 0.151021  |
| H    | -3.373547 | 5.826632  | 0.319393  | 0.148317  |
| H    | 3.373547  | 5.826632  | -0.319393 | 0.146595  |
| H    | 6.756334  | 0.000000  | 0.301180  | 0.149000  |

**Table S3.** Cartesian coordinates (x,y,z) and partial charges (*q*) on each atom of bare Hbc<sup>-</sup> computed using DFT at the M06-2X/6-31+G\* level

| Atom | x         | y         | z         | <i>q</i>  |
|------|-----------|-----------|-----------|-----------|
| C    | 1.425635  | 0.000000  | 0.007585  | -0.008020 |
| C    | 0.720650  | -1.229313 | 0.005254  | -0.053014 |
| C    | -0.720650 | -1.229313 | -0.005254 | -0.052301 |
| C    | -1.425635 | 0.000000  | -0.007585 | -0.032544 |
| C    | -0.720650 | 1.229313  | -0.005254 | -0.052301 |
| C    | 0.720650  | 1.229313  | 0.005254  | -0.053014 |
| C    | 2.875561  | 0.000000  | 0.037419  | -0.017661 |
| C    | 1.436193  | -2.465684 | -0.021342 | 0.021926  |
| C    | -1.436193 | -2.465684 | 0.021342  | 0.046947  |
| C    | -2.875561 | 0.000000  | -0.037419 | 0.047310  |
| C    | -1.436193 | 2.465684  | 0.021342  | 0.046947  |
| C    | 1.436193  | 2.465684  | -0.021342 | 0.021926  |
| C    | 4.992916  | -1.202170 | 0.172772  | -0.267114 |
| C    | 2.861685  | -2.480965 | -0.038745 | -0.041590 |
| C    | 0.733022  | -3.708523 | -0.052933 | 0.068006  |
| C    | -0.733022 | -3.708523 | 0.052933  | 0.001256  |
| C    | -2.861685 | -2.480965 | 0.038745  | -0.005936 |
| C    | -4.992916 | -1.202170 | -0.172772 | -0.226459 |
| C    | -4.992916 | 1.202170  | -0.172772 | -0.226459 |
| C    | -2.861685 | 2.480965  | 0.038745  | -0.005936 |
| C    | -0.733022 | 3.708523  | 0.052933  | 0.001256  |
| C    | 0.733022  | 3.708523  | -0.052933 | 0.068006  |
| C    | 2.861685  | 2.480965  | -0.038745 | -0.041590 |
| C    | 4.992916  | 1.202170  | 0.172772  | -0.267114 |
| C    | 3.591650  | -1.229065 | 0.057202  | 0.105057  |
| C    | 1.446235  | -4.893847 | -0.193078 | -0.220207 |
| C    | -1.446235 | -4.893847 | 0.193078  | -0.196015 |
| C    | -3.591650 | -1.229065 | -0.057202 | 0.034750  |
| C    | -3.591650 | 1.229065  | -0.057202 | 0.034750  |
| C    | -1.446235 | 4.893847  | 0.193078  | -0.196015 |
| C    | 1.446235  | 4.893847  | -0.193078 | -0.220207 |
| C    | 3.591650  | 1.229065  | 0.057202  | 0.105057  |
| C    | 3.532873  | -3.708838 | -0.168296 | -0.166399 |
| C    | 2.840612  | -4.898010 | -0.258953 | -0.153656 |
| C    | -2.840612 | -4.898010 | 0.258953  | -0.159794 |
| C    | -3.532873 | -3.708838 | 0.168296  | -0.176256 |
| C    | -5.676387 | 0.000000  | -0.238748 | -0.130540 |
| C    | -3.532873 | 3.708838  | 0.168296  | -0.176256 |
| C    | -2.840612 | 4.898010  | 0.258953  | -0.159794 |
| C    | 2.840612  | 4.898010  | -0.258953 | -0.153656 |
| C    | 3.532873  | 3.708838  | -0.168296 | -0.166399 |
| C    | 5.676387  | 0.000000  | 0.238748  | -0.094779 |
| H    | -5.553554 | 2.125551  | -0.243011 | 0.126360  |
| H    | 5.553554  | -2.125551 | 0.243011  | 0.127815  |
| H    | 4.614037  | -3.730319 | -0.233867 | 0.116569  |
| H    | -4.614037 | -3.730319 | 0.233867  | 0.115359  |
| H    | -4.614037 | 3.730319  | 0.233867  | 0.115359  |
| H    | 4.614037  | 3.730319  | -0.233867 | 0.116569  |
| H    | 0.921357  | -5.837712 | -0.279613 | 0.129206  |
| H    | -0.921357 | -5.837712 | 0.279613  | 0.119747  |
| H    | -5.553554 | -2.125551 | -0.243011 | 0.126360  |
| H    | -0.921357 | 5.837712  | 0.279613  | 0.119747  |
| H    | 0.921357  | 5.837712  | -0.279613 | 0.129206  |
| H    | 5.553554  | 2.125551  | 0.243011  | 0.127815  |
| H    | 3.375397  | -5.834287 | -0.386429 | 0.107523  |
| H    | -3.375397 | -5.834287 | 0.386429  | 0.110518  |
| H    | -6.757541 | 0.000000  | -0.348535 | 0.108078  |
| H    | -3.375397 | 5.834287  | 0.386429  | 0.110518  |
| H    | 3.375397  | 5.834287  | -0.386429 | 0.107523  |
| H    | 6.757541  | 0.000000  | 0.348535  | 0.103556  |
